# Supplementary material
Source: PubMed Central journal article supplement (PMC3639590)
Supplement: IAI.01325-12_zii999090052so1.pdf [file IAI.01325-12_zii999090052so1.pdf]

TABLE S1. Complete set of microarray data

| ID <sup>a</sup> | Fold Change <sup>b</sup> | Adjusted <i>P</i><br>value | Rank <sup>c</sup> |
|-----------------|--------------------------|----------------------------|-------------------|
| EcE22_0065      | -1.502                   | 1.06E-06                   | 140               |
| EcE22_0065      | -1.477                   | 2.64E-06                   | 188               |
| EcE22_0065      | -1.475                   | 2.90E-06                   | 197               |
| EcE22_0067      | -1.666                   | 9.32E-06                   | 252               |
| EcE22_0069      | -1.474                   | 3.29E-05                   | 341               |
| EcE22_0069      | -1.433                   | 4.12E-05                   | 356               |
| EcE22_0070      | -1.938                   | 1.31E-06                   | 157               |
| EcE22_0070      | -1.774                   | 1.40E-06                   | 158               |
| EcE22_0070      | -1.767                   | 4.49E-06                   | 212               |
| EcE22_0072      | -2.478                   | 4.89E-07                   | 103               |
| EcE22_0072      | -2.315                   | 1.11E-06                   | 146               |
| EcE22_0072      | -2.259                   | 2.36E-06                   | 182               |
| EcE22_0073      | -2.238                   | 8.95E-06                   | 250               |
| EcE22_0073      | -2.226                   | 1.11E-05                   | 265               |
| EcE22_0073      | -2.170                   | 1.53E-05                   | 289               |
| EcE22_0074      | -1.654                   | 1.60E-07                   | 79                |
| EcE22_0074      | -1.631                   | 6.02E-07                   | 110               |
| EcE22_0074      | -1.615                   | 7.96E-07                   | 128               |
| EcE22_0077      | -1.776                   | 3.81E-08                   | 63                |
| EcE22_0077      | -1.734                   | 4.79E-08                   | 68                |
| EcE22_0077      | -1.715                   | 1.07E-07                   | 77                |
| EcE22_0079      | -2.059                   | 2.36E-06                   | 183               |
| EcE22_0079      | -1.998                   | 4.15E-05                   | 358               |
| EcE22_0079      | -1.852                   | 3.82E-04                   | 532               |
| EcE22_0080      | -1.576                   | 3.35E-06                   | 203               |
| EcE22_0080      | -1.521                   | 5.95E-06                   | 228               |
| EcE22_0080      | -1.520                   | 1.36E-05                   | 280               |
| EcE22_0081      | -2.013                   | 1.27E-05                   | 270               |
| EcE22_0081      | -2.003                   | 2.10E-05                   | 316               |
| EcE22_0081      | -1.999                   | 4.12E-05                   | 357               |
| EcE22_0083      | -1.535                   | 8.44E-06                   | 248               |
| EcE22_0083      | -1.520                   | 1.93E-05                   | 306               |
| EcE22_0083      | -1.520                   | 2.09E-05                   | 315               |
| EcE22_0084      | -1.581                   | 2.18E-06                   | 178               |
| EcE22_0084      | -1.581                   | 5.54E-06                   | 224               |
| EcE22_0084      | -1.567                   | 5.58E-06                   | 225               |
| EcE22_0085      | -1.629                   | 1.06E-06                   | 141               |
| EcE22_0085      | -1.535                   | 1.11E-06                   | 147               |
| EcE22_0085      | -1.490                   | 9.04E-06                   | 251               |
| EcE22_0086      | -1.689                   | 5.05E-07                   | 104               |
| EcE22_0086      | -1.682                   | 1.11E-06                   | 148               |
| EcE22_0086      | -1.669                   | 1.15E-06                   | 152               |
| EcE22_0090      | -1.420                   | 9.98E-05                   | 427               |
| EcE22_0176      | 1.417                    | 2.26E-04                   | 496               |
| EcE22_0198      | -1.873                   | 6.32E-04                   | 575               |
| EcE22_0198      | -1.870                   | 6.56E-04                   | 579               |

| ID <sup>a</sup> | Fold Change <sup>b</sup> | Adjusted <i>P</i><br>value | Rank <sup>c</sup> |
|-----------------|--------------------------|----------------------------|-------------------|
| EcE22_0205      | -1.686                   | 7.65E-04                   | 586               |
| EcE22_0205      | -1.650                   | 2.05E-03                   | 626               |
| EcE22_0205      | -1.578                   | 3.64E-03                   | 642               |
| EcE22_0212      | -2.903                   | 1.81E-05                   | 300               |
| EcE22_0212      | -1.609                   | 1.69E-04                   | 471               |
| EcE22_0212      | -1.455                   | 3.50E-04                   | 526               |
| EcE22_0283      | 1.459                    | 1.25E-04                   | 449               |
| EcE22_0283      | 1.488                    | 5.39E-04                   | 564               |
| EcE22_0283      | 1.574                    | 4.21E-02                   | 663               |
| EcE22_0316      | -1.769                   | 3.83E-07                   | 97                |
| EcE22_0316      | -1.707                   | 2.93E-06                   | 199               |
| EcE22_0317      | -1.809                   | 8.84E-08                   | 75                |
| EcE22_0317      | -1.701                   | 1.11E-07                   | 78                |
| EcE22_0317      | -1.634                   | 1.43E-05                   | 285               |
| EcE22_0318      | -1.801                   | 1.01E-06                   | 137               |
| EcE22_0318      | -1.707                   | 1.07E-06                   | 144               |
| EcE22_0318      | -1.624                   | 1.52E-06                   | 163               |
| EcE22_0319      | -1.447                   | 1.25E-05                   | 269               |
| EcE22_0320      | -1.887                   | 6.70E-07                   | 117               |
| EcE22_0320      | -1.868                   | 7.51E-07                   | 124               |
| EcE22_0320      | -1.816                   | 7.82E-07                   | 127               |
| EcE22_0321      | -2.267                   | 3.55E-08                   | 61                |
| EcE22_0321      | -2.166                   | 8.34E-08                   | 74                |
| EcE22_0321      | -1.547                   | 1.11E-06                   | 149               |
| EcE22_0323      | -2.424                   | 3.82E-09                   | 40                |
| EcE22_0323      | -2.023                   | 7.67E-07                   | 126               |
| EcE22_0323      | -1.997                   | 1.13E-06                   | 150               |
| EcE22_0324      | -1.860                   | 2.18E-06                   | 179               |
| EcE22_0324      | -1.581                   | 4.83E-06                   | 213               |
| EcE22_0324      | -1.466                   | 1.65E-05                   | 295               |
| EcE22_0326      | -1.608                   | 3.28E-07                   | 94                |
| EcE22_0326      | -1.487                   | 1.50E-06                   | 162               |
| EcE22_0327      | 1.773                    | 3.87E-05                   | 350               |
| EcE22_0327      | 1.844                    | 4.31E-05                   | 360               |
| EcE22_0328      | 1.661                    | 1.30E-05                   | 273               |
| EcE22_0328      | 1.682                    | 1.36E-05                   | 281               |
| EcE22_0328      | 1.725                    | 4.20E-05                   | 359               |
| EcE22_0342      | 1.452                    | 9.70E-06                   | 254               |
| EcE22_0415      | -1.798                   | 1.17E-04                   | 441               |
| EcE22_0415      | -1.776                   | 1.29E-04                   | 452               |
| EcE22_0416      | -1.650                   | 1.08E-04                   | 430               |
| EcE22_0416      | -1.640                   | 1.66E-04                   | 467               |
| EcE22_0416      | -1.522                   | 2.81E-04                   | 517               |
| EcE22_0430      | -1.488                   | 1.98E-04                   | 490               |
| EcE22_0430      | -1.467                   | 4.26E-04                   | 547               |
| EcE22_0430      | -1.435                   | 4.80E-04                   | 556               |
| EcE22_0431      | -1.847                   | 3.60E-05                   | 343               |
| EcE22_0431      | -1.751                   | 4.86E-05                   | 373               |

| ID <sup>a</sup> | Fold Change <sup>b</sup> | Adjusted <i>P</i><br>value | Rank <sup>c</sup> |
|-----------------|--------------------------|----------------------------|-------------------|
| EcE22_0432      | -1.935                   | 7.94E-05                   | 411               |
| EcE22_0432      | -1.928                   | 1.17E-04                   | 440               |
| EcE22_0432      | -1.808                   | 1.83E-04                   | 476               |
| EcE22_0462      | -1.541                   | 6.71E-05                   | 403               |
| EcE22_0462      | -1.448                   | 1.14E-04                   | 438               |
| EcE22_0462      | -1.433                   | 2.85E-04                   | 518               |
| EcE22_0463      | -1.442                   | 3.25E-06                   | 201               |
| EcE22_0463      | -1.434                   | 3.35E-06                   | 204               |
| EcE22_0463      | -1.417                   | 9.81E-06                   | 261               |
| EcE22_0493      | -1.494                   | 9.78E-04                   | 605               |
| EcE22_0493      | -1.484                   | 1.44E-03                   | 617               |
| EcE22_0493      | -1.481                   | 2.41E-03                   | 630               |
| EcE22_0494      | -1.437                   | 1.63E-04                   | 466               |
| EcE22_0494      | -1.420                   | 3.75E-04                   | 531               |
| EcE22_0499      | 1.488                    | 2.75E-02                   | 662               |
| EcE22_0504      | -1.583                   | 2.46E-05                   | 324               |
| EcE22_0504      | -1.570                   | 2.81E-05                   | 329               |
| EcE22_0504      | -1.540                   | 1.11E-04                   | 437               |
| EcE22_0508      | 1.417                    | 3.20E-05                   | 339               |
| EcE22_0533      | -1.537                   | 1.54E-06                   | 164               |
| EcE22_0536      | -2.943                   | 2.69E-04                   | 507               |
| EcE22_0536      | -2.796                   | 3.67E-04                   | 529               |
| EcE22_0536      | -2.595                   | 3.87E-04                   | 535               |
| EcE22_0618      | -1.425                   | 6.83E-04                   | 584               |
| EcE22_0625      | -1.765                   | 2.64E-06                   | 189               |
| EcE22_0625      | -1.730                   | 1.21E-05                   | 267               |
| EcE22_0625      | -1.701                   | 1.58E-05                   | 293               |
| EcE22_0626      | -2.052                   | 4.83E-06                   | 214               |
| EcE22_0626      | -1.896                   | 1.04E-05                   | 262               |
| EcE22_0626      | -1.548                   | 1.75E-05                   | 297               |
| EcE22_0627      | -2.162                   | 1.90E-05                   | 304               |
| EcE22_0627      | -2.074                   | 4.51E-05                   | 365               |
| EcE22_0627      | -2.028                   | 6.43E-05                   | 400               |
| EcE22_0628      | -1.922                   | 6.11E-05                   | 394               |
| EcE22_0628      | -1.889                   | 9.74E-05                   | 425               |
| EcE22_0628      | -1.827                   | 1.30E-04                   | 453               |
| EcE22_0629      | -2.472                   | 1.22E-04                   | 444               |
| EcE22_0629      | -2.387                   | 1.57E-04                   | 463               |
| EcE22_0629      | -2.334                   | 1.85E-04                   | 481               |
| EcE22_0696      | -1.458                   | 8.96E-04                   | 602               |
| EcE22_0702      | 1.969                    | 1.46E-05                   | 287               |
| EcE22_0702      | 2.043                    | 4.40E-05                   | 362               |
| EcE22_0702      | 2.519                    | 8.77E-05                   | 418               |
| EcE22_0752      | 1.423                    | 3.87E-03                   | 644               |
| EcE22_0752      | 1.431                    | 4.87E-03                   | 648               |
| EcE22_0752      | 1.441                    | 6.11E-03                   | 650               |
| EcE22_0763      | -1.746                   | 2.71E-07                   | 90                |
| EcE22_0763      | -1.725                   | 4.75E-07                   | 100               |

| ID <sup>a</sup> | Fold Change <sup>b</sup> | Adjusted <i>P</i><br>value | Rank <sup>c</sup> |
|-----------------|--------------------------|----------------------------|-------------------|
| EcE22_0764      | -1.537                   | 8.66E-07                   | 131               |
| EcE22_0764      | -1.492                   | 8.04E-06                   | 247               |
| EcE22_0765      | -1.778                   | 2.92E-07                   | 91                |
| EcE22_0765      | -1.758                   | 4.42E-07                   | 98                |
| EcE22_0765      | -1.650                   | 1.06E-06                   | 142               |
| EcE22_0766      | -1.587                   | 5.95E-07                   | 108               |
| EcE22_0767      | -2.200                   | 4.42E-07                   | 99                |
| EcE22_0767      | -2.165                   | 6.28E-07                   | 112               |
| EcE22_0767      | -2.071                   | 8.66E-07                   | 132               |
| EcE22_0769      | -1.571                   | 6.49E-06                   | 234               |
| EcE22_0769      | -1.562                   | 7.34E-06                   | 242               |
| EcE22_0769      | -1.544                   | 9.32E-06                   | 253               |
| EcE22_0770      | -1.763                   | 3.89E-05                   | 351               |
| EcE22_0770      | -1.747                   | 5.20E-05                   | 381               |
| EcE22_0770      | -1.744                   | 6.21E-05                   | 396               |
| EcE22_0771      | -1.807                   | 1.57E-05                   | 292               |
| EcE22_0771      | -1.794                   | 2.85E-05                   | 332               |
| EcE22_0771      | -1.787                   | 3.19E-05                   | 338               |
| EcE22_0773      | -1.756                   | 2.12E-07                   | 86                |
| EcE22_0773      | -1.702                   | 1.56E-06                   | 166               |
| EcE22_0773      | -1.617                   | 2.36E-06                   | 184               |
| EcE22_0774      | -2.031                   | 3.89E-08                   | 64                |
| EcE22_0774      | -1.888                   | 8.08E-08                   | 73                |
| EcE22_0774      | -1.886                   | 1.73E-07                   | 80                |
| EcE22_0775      | -1.779                   | 7.04E-08                   | 72                |
| EcE22_0775      | -1.742                   | 9.96E-08                   | 76                |
| EcE22_0775      | -1.567                   | 5.80E-04                   | 568               |
| EcE22_0776      | -1.620                   | 1.02E-06                   | 138               |
| EcE22_0776      | -1.609                   | 1.20E-06                   | 154               |
| EcE22_0776      | -1.589                   | 7.71E-06                   | 245               |
| EcE22_0783      | -1.971                   | 3.65E-06                   | 207               |
| EcE22_0783      | -1.940                   | 4.83E-06                   | 215               |
| EcE22_0783      | -1.932                   | 5.95E-06                   | 229               |
| EcE22_0784      | -1.686                   | 5.65E-05                   | 389               |
| EcE22_0784      | -1.684                   | 8.78E-05                   | 419               |
| EcE22_0784      | -1.665                   | 1.11E-04                   | 435               |
| EcE22_0785      | -1.641                   | 1.81E-05                   | 301               |
| EcE22_0785      | -1.631                   | 2.29E-05                   | 321               |
| EcE22_0785      | -1.630                   | 4.77E-05                   | 371               |
| EcE22_0795      | -1.653                   | 1.49E-04                   | 459               |
| EcE22_0795      | -1.592                   | 3.68E-04                   | 530               |
| EcE22_0795      | -1.447                   | 1.99E-03                   | 624               |
| EcE22_0864      | -3.776                   | 1.86E-08                   | 58                |
| EcE22_0864      | -3.308                   | 4.84E-08                   | 69                |
| EcE22_0864      | -2.981                   | 5.02E-08                   | 71                |
| EcE22_0865      | -1.455                   | 3.31E-06                   | 202               |
| EcE22_0866      | -5.176                   | 4.67E-09                   | 43                |
| EcE22_0866      | -4.753                   | 2.63E-08                   | 59                |

| ID <sup>a</sup> | Fold Change <sup>b</sup> | Adjusted <i>P</i><br>value | Rank <sup>c</sup> |
|-----------------|--------------------------|----------------------------|-------------------|
| EcE22_0867      | -4.508                   | 1.80E-08                   | 55                |
| EcE22_0867      | -3.483                   | 1.83E-08                   | 57                |
| EcE22_0868      | -3.802                   | 1.57E-08                   | 51                |
| EcE22_0868      | -3.425                   | 2.64E-08                   | 60                |
| EcE22_0868      | -2.771                   | 3.82E-07                   | 96                |
| EcE22_0869      | -1.685                   | 9.70E-06                   | 255               |
| EcE22_0869      | -1.472                   | 1.53E-05                   | 290               |
| EcE22_0869      | -1.416                   | 2.35E-04                   | 499               |
| EcE22_0870      | -2.253                   | 2.52E-07                   | 89                |
| EcE22_0870      | -2.127                   | 6.74E-07                   | 120               |
| EcE22_0870      | -2.055                   | 7.34E-07                   | 121               |
| EcE22_0912      | -1.591                   | 1.32E-03                   | 615               |
| EcE22_0933      | 1.422                    | 2.43E-03                   | 631               |
| EcE22_0964      | -1.542                   | 3.01E-05                   | 333               |
| EcE22_0964      | -1.520                   | 3.78E-05                   | 348               |
| EcE22_0964      | -1.497                   | 4.40E-05                   | 363               |
| EcE22_1029      | -1.714                   | 2.34E-04                   | 498               |
| EcE22_1029      | -1.669                   | 2.71E-04                   | 509               |
| EcE22_1029      | -1.641                   | 3.36E-04                   | 524               |
| EcE22_1030      | -2.000                   | 4.26E-04                   | 548               |
| EcE22_1030      | -1.711                   | 6.51E-04                   | 578               |
| EcE22_1030      | -1.640                   | 8.38E-04                   | 594               |
| EcE22_1031      | -1.477                   | 4.08E-04                   | 542               |
| EcE22_1180      | 1.418                    | 8.49E-04                   | 595               |
| EcE22_1180      | 1.455                    | 8.67E-04                   | 597               |
| EcE22_1180      | 1.481                    | 1.19E-03                   | 613               |
| EcE22_1182      | 1.424                    | 4.15E-04                   | 544               |
| EcE22_1182      | 1.452                    | 5.16E-04                   | 559               |
| EcE22_1182      | 1.458                    | 8.30E-04                   | 593               |
| EcE22_1203      | -1.538                   | 1.05E-04                   | 429               |
| EcE22_1203      | -1.471                   | 1.73E-04                   | 473               |
| EcE22_1203      | -1.461                   | 3.95E-04                   | 537               |
| EcE22_1204      | -1.976                   | 2.32E-03                   | 629               |
| EcE22_1205      | -1.902                   | 1.41E-04                   | 455               |
| EcE22_1205      | -1.837                   | 2.55E-04                   | 503               |
| EcE22_1205      | -1.794                   | 2.96E-04                   | 519               |
| EcE22_1206      | -1.825                   | 3.23E-05                   | 340               |
| EcE22_1206      | -1.720                   | 3.65E-05                   | 345               |
| EcE22_1206      | -1.598                   | 5.07E-05                   | 377               |
| EcE22_1341      | -1.789                   | 6.22E-04                   | 572               |
| EcE22_1341      | -1.786                   | 8.14E-04                   | 592               |
| EcE22_1341      | -1.775                   | 9.02E-04                   | 603               |
| EcE22_1342      | -1.892                   | 1.89E-04                   | 482               |
| EcE22_1342      | -1.721                   | 1.94E-04                   | 485               |
| EcE22_1342      | -1.420                   | 4.25E-04                   | 546               |
| EcE22_1343      | 1.419                    | 3.29E-04                   | 522               |
| EcE22_1343      | 1.499                    | 4.03E-04                   | 541               |
| EcE22_1343      | 1.592                    | 7.77E-04                   | 588               |

| ID <sup>a</sup> | Fold Change <sup>b</sup> | Adjusted <i>P</i><br>value | Rank <sup>c</sup> |
|-----------------|--------------------------|----------------------------|-------------------|
| EcE22_1356      | 1.778                    | 1.63E-05                   | 294               |
| EcE22_1356      | 1.793                    | 1.10E-04                   | 434               |
| EcE22_1516      | 1.444                    | 1.96E-05                   | 309               |
| EcE22_1516      | 1.674                    | 2.31E-05                   | 322               |
| EcE22_1516      | 1.678                    | 4.86E-05                   | 374               |
| EcE22_1517      | 1.434                    | 1.06E-06                   | 143               |
| EcE22_1517      | 1.561                    | 1.29E-05                   | 272               |
| EcE22_1517      | 1.882                    | 1.30E-05                   | 275               |
| EcE22_1518      | 1.651                    | 4.21E-04                   | 545               |
| EcE22_1518      | 1.849                    | 4.48E-04                   | 550               |
| EcE22_1518      | 1.888                    | 5.59E-04                   | 566               |
| EcE22_1526      | 1.463                    | 2.28E-02                   | 659               |
| EcE22_1526      | 1.480                    | 2.29E-02                   | 660               |
| EcE22_1526      | 1.491                    | 2.41E-02                   | 661               |
| EcE22_1547      | -2.291                   | 7.76E-05                   | 410               |
| EcE22_1547      | -2.223                   | 1.05E-04                   | 428               |
| EcE22_1547      | -2.165                   | 2.43E-04                   | 502               |
| EcE22_1552      | -1.849                   | 4.78E-03                   | 646               |
| EcE22_1552      | -1.745                   | 6.23E-03                   | 651               |
| EcE22_1552      | -1.728                   | 6.24E-03                   | 652               |
| EcE22_1553      | -1.768                   | 8.73E-04                   | 598               |
| EcE22_1553      | -1.712                   | 9.47E-04                   | 604               |
| EcE22_1553      | -1.700                   | 1.10E-03                   | 608               |
| EcE22_1554      | -1.764                   | 6.05E-05                   | 393               |
| EcE22_1554      | -1.754                   | 6.27E-05                   | 398               |
| EcE22_1554      | -1.735                   | 7.52E-05                   | 408               |
| EcE22_1555      | -1.525                   | 3.27E-04                   | 521               |
| EcE22_1555      | -1.520                   | 3.38E-04                   | 525               |
| EcE22_1555      | -1.495                   | 6.51E-04                   | 577               |
| EcE22_1556      | -1.537                   | 5.26E-04                   | 561               |
| EcE22_1556      | -1.517                   | 5.90E-04                   | 570               |
| EcE22_1556      | -1.495                   | 6.45E-04                   | 576               |
| EcE22_1562      | 1.665                    | 1.42E-04                   | 456               |
| EcE22_1562      | 1.680                    | 1.53E-04                   | 460               |
| EcE22_1562      | 1.711                    | 2.38E-04                   | 501               |
| EcE22_1563      | 1.615                    | 6.00E-05                   | 392               |
| EcE22_1563      | 1.628                    | 8.37E-05                   | 416               |
| EcE22_1563      | 1.642                    | 1.57E-04                   | 464               |
| EcE22_1564      | 1.676                    | 7.96E-07                   | 129               |
| EcE22_1564      | 1.721                    | 7.17E-06                   | 241               |
| EcE22_1564      | 1.945                    | 4.66E-05                   | 367               |
| EcE22_1565      | 1.416                    | 9.54E-05                   | 421               |
| EcE22_1623      | 1.485                    | 2.06E-05                   | 314               |
| EcE22_1623      | 1.569                    | 3.01E-05                   | 334               |
| EcE22_1624      | 1.559                    | 7.52E-06                   | 243               |
| EcE22_1624      | 1.612                    | 2.74E-05                   | 328               |
| EcE22_1624      | 1.836                    | 3.99E-05                   | 352               |
| EcE22_1646      | -1.470                   | 3.53E-04                   | 527               |

| ID <sup>a</sup> | Fold Change <sup>b</sup> | Adjusted <i>P</i><br>value | Rank <sup>c</sup> |
|-----------------|--------------------------|----------------------------|-------------------|
| EcE22_1647      | -1.649                   | 5.56E-05                   | 386               |
| EcE22_1647      | -1.647                   | 6.97E-05                   | 405               |
| EcE22_1661      | 1.425                    | 1.22E-04                   | 445               |
| EcE22_1759      | 1.595                    | 1.58E-04                   | 465               |
| EcE22_1773      | 2.241                    | 4.51E-05                   | 366               |
| EcE22_1773      | 2.252                    | 1.82E-04                   | 475               |
| EcE22_1829      | 1.441                    | 1.31E-04                   | 454               |
| EcE22_1830      | 1.519                    | 5.99E-07                   | 109               |
| EcE22_1831      | 1.456                    | 6.37E-07                   | 114               |
| EcE22_1831      | 1.457                    | 1.25E-06                   | 156               |
| EcE22_1831      | 1.463                    | 2.36E-06                   | 185               |
| EcE22_1833      | 1.484                    | 1.76E-04                   | 474               |
| EcE22_1833      | 1.490                    | 1.84E-04                   | 478               |
| EcE22_1833      | 1.506                    | 3.32E-04                   | 523               |
| EcE22_1835      | 1.696                    | 2.69E-03                   | 636               |
| EcE22_1836      | 1.451                    | 3.84E-04                   | 533               |
| EcE22_1836      | 1.502                    | 2.60E-03                   | 634               |
| EcE22_1837      | 1.417                    | 5.57E-05                   | 387               |
| EcE22_1837      | 1.619                    | 5.29E-04                   | 562               |
| EcE22_1906      | -1.504                   | 2.07E-04                   | 494               |
| EcE22_1907      | -1.602                   | 2.68E-04                   | 506               |
| EcE22_1907      | -1.573                   | 2.79E-04                   | 516               |
| EcE22_1907      | -1.530                   | 3.04E-04                   | 520               |
| EcE22_1909      | -1.598                   | 1.06E-05                   | 263               |
| EcE22_1909      | -1.559                   | 6.31E-05                   | 399               |
| EcE22_1935      | -1.627                   | 5.58E-05                   | 388               |
| EcE22_1935      | -1.565                   | 1.47E-04                   | 458               |
| EcE22_1935      | -1.543                   | 3.97E-04                   | 538               |
| EcE22_2006      | 1.459                    | 4.96E-06                   | 219               |
| EcE22_2006      | 1.488                    | 9.70E-06                   | 256               |
| EcE22_2006      | 1.504                    | 2.31E-05                   | 323               |
| EcE22_2014      | -1.455                   | 1.40E-06                   | 159               |
| EcE22_2050      | 1.435                    | 1.93E-05                   | 307               |
| EcE22_2057      | -1.528                   | 2.69E-04                   | 508               |
| EcE22_2057      | -1.510                   | 4.50E-04                   | 551               |
| EcE22_2057      | -1.496                   | 6.67E-04                   | 582               |
| EcE22_2058      | -1.814                   | 1.93E-05                   | 308               |
| EcE22_2058      | -1.732                   | 8.54E-05                   | 417               |
| EcE22_2058      | -1.702                   | 1.68E-04                   | 469               |
| EcE22_2059      | -1.840                   | 1.09E-03                   | 607               |
| EcE22_2059      | -1.822                   | 1.19E-03                   | 612               |
| EcE22_2059      | -1.798                   | 1.59E-03                   | 620               |
| EcE22_2060      | -1.836                   | 8.80E-04                   | 599               |
| EcE22_2060      | -1.805                   | 9.84E-04                   | 606               |
| EcE22_2060      | -1.753                   | 1.46E-03                   | 618               |
| EcE22_2203      | -1.824                   | 1.40E-05                   | 283               |
| EcE22_2203      | -1.814                   | 1.75E-05                   | 298               |
| EcE22_2203      | -1.800                   | 2.10E-05                   | 317               |

| ID <sup>a</sup> | Fold Change <sup>b</sup> | Adjusted <i>P</i><br>value | Rank <sup>c</sup> |
|-----------------|--------------------------|----------------------------|-------------------|
| EcE22_2278      | -1.421                   | 2.63E-03                   | 635               |
| EcE22_2312      | -2.512                   | 1.27E-05                   | 271               |
| EcE22_2312      | -2.178                   | 1.53E-05                   | 291               |
| EcE22_2312      | -2.010                   | 1.86E-05                   | 303               |
| EcE22_2317      | -1.499                   | 1.04E-06                   | 139               |
| EcE22_2318      | -1.430                   | 4.66E-05                   | 368               |
| EcE22_2318      | -1.418                   | 8.15E-05                   | 413               |
| EcE22_2319      | -1.827                   | 4.59E-08                   | 66                |
| EcE22_2319      | -1.812                   | 2.03E-07                   | 85                |
| EcE22_2319      | -1.733                   | 6.51E-07                   | 115               |
| EcE22_2320      | -1.877                   | 8.83E-06                   | 249               |
| EcE22_2320      | -1.863                   | 1.97E-05                   | 310               |
| EcE22_2320      | -1.839                   | 1.99E-05                   | 311               |
| EcE22_2322      | -1.932                   | 6.72E-07                   | 119               |
| EcE22_2322      | -1.778                   | 1.45E-06                   | 161               |
| EcE22_2322      | -1.719                   | 1.84E-06                   | 172               |
| EcE22_2323      | -2.044                   | 3.26E-07                   | 93                |
| EcE22_2323      | -1.879                   | 4.84E-07                   | 102               |
| EcE22_2323      | -1.798                   | 2.89E-06                   | 196               |
| EcE22_2324      | -1.459                   | 7.51E-07                   | 125               |
| EcE22_2324      | -1.437                   | 2.85E-06                   | 194               |
| EcE22_2324      | -1.418                   | 3.48E-06                   | 206               |
| EcE22_2325      | -1.748                   | 2.01E-07                   | 84                |
| EcE22_2325      | -1.604                   | 6.70E-07                   | 118               |
| EcE22_2325      | -1.458                   | 1.18E-06                   | 153               |
| EcE22_2326      | -2.384                   | 5.82E-07                   | 106               |
| EcE22_2326      | -1.939                   | 7.34E-07                   | 122               |
| EcE22_2326      | -1.853                   | 6.03E-06                   | 230               |
| EcE22_2328      | -2.827                   | 1.91E-05                   | 305               |
| EcE22_2328      | -2.797                   | 2.22E-05                   | 320               |
| EcE22_2328      | -2.303                   | 3.79E-05                   | 349               |
| EcE22_2329      | -1.690                   | 2.92E-07                   | 92                |
| EcE22_2329      | -1.657                   | 5.38E-07                   | 105               |
| EcE22_2329      | -1.630                   | 1.09E-06                   | 145               |
| EcE22_2331      | -1.852                   | 3.99E-05                   | 353               |
| EcE22_2331      | -1.741                   | 4.86E-05                   | 375               |
| EcE22_2331      | -1.503                   | 2.71E-04                   | 510               |
| EcE22_2332      | -1.448                   | 1.31E-05                   | 277               |
| EcE22_2334      | -1.507                   | 4.46E-05                   | 364               |
| EcE22_2335      | -1.720                   | 9.67E-07                   | 134               |
| EcE22_2335      | -1.685                   | 1.99E-06                   | 174               |
| EcE22_2335      | -1.659                   | 2.73E-06                   | 192               |
| EcE22_2337      | -1.479                   | 3.69E-06                   | 208               |
| EcE22_2338      | -2.070                   | 9.96E-09                   | 49                |
| EcE22_2338      | -2.032                   | 1.72E-08                   | 54                |
| EcE22_2338      | -1.922                   | 3.89E-08                   | 65                |
| EcE22_2339      | -1.959                   | 6.02E-07                   | 111               |
| EcE22_2339      | -1.929                   | 9.98E-07                   | 135               |



| ID <sup>a</sup> | Fold Change <sup>b</sup> | Adjusted <i>P</i><br>value | Rank <sup>c</sup> |
|-----------------|--------------------------|----------------------------|-------------------|
| EcE22_2340      | -1.912                   | 4.59E-08                   | 67                |
| EcE22_2340      | -1.842                   | 2.31E-07                   | 87                |
| EcE22_2340      | -1.815                   | 2.43E-07                   | 88                |
| EcE22_2347      | -1.460                   | 1.31E-05                   | 278               |
| EcE22_2349      | -1.562                   | 1.31E-05                   | 279               |
| EcE22_2349      | -1.551                   | 1.83E-05                   | 302               |
| EcE22_2349      | -1.512                   | 9.66E-05                   | 423               |
| EcE22_2352      | -1.479                   | 1.54E-06                   | 165               |
| EcE22_2352      | -1.451                   | 2.36E-06                   | 186               |
| EcE22_2355      | -1.700                   | 9.70E-06                   | 257               |
| EcE22_2355      | -1.433                   | 5.65E-05                   | 390               |
| EcE22_2420      | -1.484                   | 4.31E-05                   | 361               |
| EcE22_2420      | -1.444                   | 1.68E-04                   | 468               |
| EcE22_2421      | -1.628                   | 5.86E-06                   | 226               |
| EcE22_2421      | -1.517                   | 6.22E-06                   | 231               |
| EcE22_2479      | -1.444                   | 2.71E-04                   | 511               |
| EcE22_2482      | -2.027                   | 2.05E-04                   | 493               |
| EcE22_2482      | -1.763                   | 1.57E-03                   | 619               |
| EcE22_2482      | -1.623                   | 2.23E-03                   | 627               |
| EcE22_2483      | -1.687                   | 2.36E-04                   | 500               |
| EcE22_2483      | -1.674                   | 2.75E-04                   | 515               |
| EcE22_2483      | -1.601                   | 3.93E-04                   | 536               |
| EcE22_2485      | 1.461                    | 2.70E-05                   | 327               |
| EcE22_2485      | 1.466                    | 3.06E-05                   | 336               |
| EcE22_2485      | 1.475                    | 7.66E-05                   | 409               |
| EcE22_2567      | -1.428                   | 5.10E-04                   | 557               |
| EcE22_2568      | -1.449                   | 1.66E-03                   | 623               |
| EcE22_2568      | -1.445                   | 3.43E-03                   | 641               |
| EcE22_2569      | -1.857                   | 5.10E-04                   | 558               |
| EcE22_2569      | -1.700                   | 7.24E-04                   | 585               |
| EcE22_2569      | -1.685                   | 1.21E-03                   | 614               |
| EcE22_2570      | -1.812                   | 6.84E-05                   | 404               |
| EcE22_2570      | -1.784                   | 1.09E-04                   | 433               |
| EcE22_2570      | -1.763                   | 1.54E-04                   | 462               |
| EcE22_2691      | 1.471                    | 1.75E-05                   | 299               |
| EcE22_2892      | -1.535                   | 4.73E-04                   | 554               |
| EcE22_2892      | -1.498                   | 5.36E-04                   | 563               |
| EcE22_2892      | -1.473                   | 5.92E-04                   | 571               |
| EcE22_2893      | -1.495                   | 8.82E-04                   | 600               |
| EcE22_2893      | -1.491                   | 1.15E-03                   | 611               |
| EcE22_2894      | -1.643                   | 1.11E-03                   | 609               |
| EcE22_2922      | -7.380                   | 1.77E-10                   | 19                |
| EcE22_2922      | -6.990                   | 1.99E-09                   | 36                |
| EcE22_2922      | -4.433                   | 1.63E-08                   | 53                |
| EcE22_2924      | -12.360                  | 1.05E-10                   | 9                 |
| EcE22_2924      | -10.687                  | 1.05E-10                   | 10                |
| EcE22_2924      | -10.133                  | 1.14E-10                   | 16                |
| EcE22_2925      | -10.959                  | 1.05E-10                   | 11                |

| ID <sup>a</sup> | Fold Change <sup>b</sup> | Adjusted <i>P</i><br>value | Rank <sup>c</sup> |
|-----------------|--------------------------|----------------------------|-------------------|
| EcE22_2925      | -9.477                   | 2.46E-10                   | 20                |
| EcE22_2926      | -9.674                   | 1.57E-08                   | 52                |
| EcE22_2926      | -9.463                   | 4.97E-08                   | 70                |
| EcE22_2926      | -7.632                   | 1.88E-07                   | 83                |
| EcE22_2927      | -11.713                  | 8.69E-10                   | 28                |
| EcE22_2927      | -10.656                  | 1.10E-09                   | 32                |
| EcE22_2927      | -10.167                  | 1.15E-09                   | 33                |
| EcE22_2928      | -13.823                  | 8.51E-10                   | 27                |
| EcE22_2928      | -13.560                  | 3.86E-09                   | 42                |
| EcE22_2928      | -11.334                  | 4.67E-09                   | 44                |
| EcE22_3019      | 1.532                    | 6.89E-06                   | 239               |
| EcE22_3019      | 1.541                    | 7.71E-06                   | 246               |
| EcE22_3019      | 1.551                    | 9.70E-06                   | 258               |
| EcE22_3075      | 1.661                    | 8.95E-05                   | 420               |
| EcE22_3075      | 2.255                    | 2.56E-04                   | 504               |
| EcE22_3076      | 1.732                    | 3.84E-04                   | 534               |
| EcE22_3076      | 1.775                    | 8.92E-04                   | 601               |
| EcE22_3076      | 1.931                    | 1.61E-03                   | 622               |
| EcE22_3082      | -1.501                   | 7.40E-07                   | 123               |
| EcE22_3082      | -1.449                   | 5.30E-06                   | 221               |
| EcE22_3148      | -1.690                   | 4.76E-05                   | 370               |
| EcE22_3148      | -1.684                   | 7.51E-05                   | 407               |
| EcE22_3148      | -1.597                   | 1.22E-04                   | 446               |
| EcE22_3149      | -1.795                   | 4.05E-05                   | 355               |
| EcE22_3149      | -1.746                   | 5.14E-05                   | 380               |
| EcE22_3149      | -1.674                   | 6.43E-05                   | 401               |
| EcE22_3150      | -1.934                   | 4.69E-05                   | 369               |
| EcE22_3150      | -1.913                   | 5.11E-05                   | 378               |
| EcE22_3150      | -1.868                   | 8.00E-05                   | 412               |
| EcE22_3151      | -2.052                   | 4.26E-04                   | 549               |
| EcE22_3151      | -2.040                   | 5.24E-04                   | 560               |
| EcE22_3151      | -1.951                   | 6.67E-04                   | 581               |
| EcE22_3233      | 1.542                    | 1.95E-06                   | 173               |
| EcE22_3251      | -1.455                   | 5.90E-05                   | 391               |
| EcE22_3253      | -1.548                   | 1.92E-04                   | 484               |
| EcE22_3253      | -1.516                   | 1.98E-04                   | 488               |
| EcE22_3253      | -1.481                   | 2.71E-04                   | 513               |
| EcE22_3262      | 1.467                    | 7.74E-04                   | 587               |
| EcE22_3340      | -1.441                   | 5.30E-06                   | 222               |
| EcE22_3352      | 1.462                    | 1.97E-04                   | 486               |
| EcE22_3352      | 1.482                    | 3.97E-04                   | 539               |
| EcE22_3352      | 1.544                    | 6.31E-04                   | 574               |
| EcE22_3353      | 1.448                    | 2.01E-04                   | 491               |
| EcE22_3385      | 1.905                    | 2.70E-06                   | 191               |
| EcE22_3385      | 1.988                    | 6.51E-06                   | 236               |
| EcE22_3385      | 1.997                    | 1.40E-05                   | 284               |
| EcE22_3487      | -1.425                   | 1.91E-04                   | 483               |
| EcE22_3488      | -1.415                   | 2.71E-04                   | 514               |

| ID <sup>a</sup> | Fold Change <sup>b</sup> | Adjusted <i>P</i><br>value | Rank <sup>c</sup> |
|-----------------|--------------------------|----------------------------|-------------------|
| EcE22_3489      | -1.545                   | 5.70E-04                   | 567               |
| EcE22_3489      | -1.539                   | 7.79E-04                   | 590               |
| EcE22_3490      | -1.489                   | 2.97E-03                   | 638               |
| EcE22_3490      | -1.421                   | 3.77E-03                   | 643               |
| EcE22_3490      | -1.415                   | 4.47E-03                   | 645               |
| EcE22_3516      | -1.419                   | 1.53E-04                   | 461               |
| EcE22_3518      | -1.628                   | 9.72E-05                   | 424               |
| EcE22_3518      | -1.527                   | 1.11E-04                   | 436               |
| EcE22_3518      | -1.480                   | 1.24E-04                   | 448               |
| EcE22_3554      | -1.506                   | 2.87E-03                   | 637               |
| EcE22_3554      | -1.478                   | 4.83E-03                   | 647               |
| EcE22_3554      | -1.447                   | 5.34E-03                   | 649               |
| EcE22_3572      | -1.463                   | 7.46E-05                   | 406               |
| EcE22_3634      | 1.463                    | 2.01E-05                   | 312               |
| EcE22_3682      | 1.507                    | 1.08E-04                   | 431               |
| EcE22_3682      | 1.549                    | 1.19E-04                   | 443               |
| EcE22_3718      | 1.443                    | 4.82E-05                   | 372               |
| EcE22_3747      | 1.467                    | 2.50E-05                   | 326               |
| EcE22_3747      | 1.502                    | 5.12E-05                   | 379               |
| EcE22_3748      | 1.564                    | 1.21E-05                   | 268               |
| EcE22_3748      | 1.589                    | 8.33E-05                   | 415               |
| EcE22_3748      | 1.848                    | 1.84E-04                   | 479               |
| EcE22_3760      | -1.502                   | 8.51E-04                   | 596               |
| EcE22_3760      | -1.418                   | 2.03E-03                   | 625               |
| EcE22_3812      | -1.570                   | 1.38E-05                   | 282               |
| EcE22_3958      | -1.524                   | 4.58E-04                   | 552               |
| EcE22_3958      | -1.523                   | 6.24E-04                   | 573               |
| EcE22_3958      | -1.473                   | 6.70E-04                   | 583               |
| EcE22_4021      | -6.009                   | 1.61E-10                   | 18                |
| EcE22_4021      | -5.940                   | 6.87E-10                   | 23                |
| EcE22_4021      | -5.761                   | 6.87E-10                   | 24                |
| EcE22_4022      | -1.639                   | 3.37E-06                   | 205               |
| EcE22_4022      | -1.555                   | 6.41E-06                   | 233               |
| EcE22_4022      | -1.498                   | 1.27E-04                   | 450               |
| EcE22_4023      | -1.678                   | 1.24E-06                   | 155               |
| EcE22_4023      | -1.457                   | 3.84E-06                   | 209               |
| EcE22_4033      | 1.526                    | 2.18E-06                   | 180               |
| EcE22_4033      | 1.552                    | 6.24E-06                   | 232               |
| EcE22_4033      | 1.614                    | 7.55E-06                   | 244               |
| EcE22_4036      | 1.444                    | 3.28E-07                   | 95                |
| EcE22_4036      | 1.478                    | 4.79E-07                   | 101               |
| EcE22_4038      | 1.588                    | 8.66E-07                   | 133               |
| EcE22_4038      | 1.595                    | 2.03E-06                   | 176               |
| EcE22_4038      | 1.601                    | 4.07E-06                   | 211               |
| EcE22_4076      | -1.556                   | 1.16E-04                   | 439               |
| EcE22_4217      | -1.527                   | 1.23E-02                   | 656               |
| EcE22_4217      | -1.501                   | 1.25E-02                   | 657               |
| EcE22_4219      | -1.682                   | 1.42E-04                   | 457               |

| ID <sup>a</sup> | Fold Change <sup>b</sup> | Adjusted <i>P</i><br>value | Rank <sup>c</sup> |
|-----------------|--------------------------|----------------------------|-------------------|
| EcE22_4219      | -1.522                   | 4.12E-04                   | 543               |
| EcE22_4343      | -3.481                   | 8.04E-07                   | 130               |
| EcE22_4343      | -3.214                   | 1.64E-06                   | 168               |
| EcE22_4343      | -3.098                   | 1.75E-06                   | 170               |
| EcE22_4344      | -2.647                   | 1.81E-06                   | 171               |
| EcE22_4344      | -2.511                   | 2.90E-06                   | 198               |
| EcE22_4344      | -2.430                   | 3.89E-06                   | 210               |
| EcE22_4345      | -2.725                   | 2.85E-06                   | 195               |
| EcE22_4345      | -2.720                   | 1.51E-05                   | 288               |
| EcE22_4345      | -2.469                   | 1.65E-05                   | 296               |
| EcE22_4346      | -2.437                   | 9.54E-05                   | 422               |
| EcE22_4346      | -2.407                   | 1.17E-04                   | 442               |
| EcE22_4346      | -2.210                   | 1.68E-04                   | 470               |
| EcE22_4371      | -1.446                   | 4.65E-04                   | 553               |
| EcE22_4426      | 1.482                    | 2.46E-05                   | 325               |
| EcE22_4426      | 1.492                    | 5.48E-05                   | 385               |
| EcE22_4426      | 1.680                    | 2.26E-04                   | 495               |
| EcE22_4500      | 1.423                    | 2.15E-05                   | 319               |
| EcE22_4504      | 1.447                    | 1.28E-04                   | 451               |
| EcE22_4546      | -2.391                   | 1.61E-06                   | 167               |
| EcE22_4546      | -2.240                   | 2.19E-06                   | 181               |
| EcE22_4730      | -2.197                   | 1.45E-05                   | 286               |
| EcE22_4730      | -2.182                   | 2.82E-05                   | 330               |
| EcE22_4748      | -1.657                   | 1.09E-04                   | 432               |
| EcE22_4748      | -1.617                   | 2.62E-04                   | 505               |
| EcE22_4756      | -1.453                   | 2.02E-05                   | 313               |
| EcE22_4756      | -1.447                   | 4.01E-05                   | 354               |
| EcE22_4756      | -1.444                   | 5.30E-05                   | 383               |
| EcE22_4757      | 1.469                    | 9.70E-06                   | 259               |
| EcE22_4771      | -1.512                   | 1.09E-05                   | 264               |
| EcE22_4773      | -1.443                   | 1.98E-04                   | 489               |
| EcE22_4773      | -1.438                   | 3.40E-03                   | 640               |
| EcE22_4843      | 1.538                    | 6.82E-06                   | 238               |
| EcE22_4926      | -1.829                   | 1.97E-04                   | 487               |
| EcE22_4926      | -1.754                   | 2.03E-04                   | 492               |
| EcE22_4926      | -1.453                   | 7.77E-04                   | 589               |
| EcE22_4932      | -1.464                   | 1.85E-04                   | 480               |
| EcE22_4961      | -1.503                   | 4.83E-06                   | 216               |
| EcE22_4961      | -1.472                   | 5.88E-06                   | 227               |
| EcE22_5043      | -2.728                   | 2.83E-05                   | 331               |
| EcE22_5043      | -2.607                   | 3.67E-05                   | 346               |
| EcE22_5043      | -2.574                   | 4.93E-05                   | 376               |
| EcE22_5102      | 1.479                    | 2.27E-03                   | 628               |
| EcE22_5102      | 1.486                    | 2.44E-03                   | 632               |
| EcE22_5102      | 1.506                    | 3.14E-03                   | 639               |
| EcE22_5113      | -1.506                   | 5.91E-07                   | 107               |
| EcE22_5113      | -1.460                   | 6.28E-07                   | 113               |
| EcE22_5113      | -1.459                   | 6.95E-06                   | 240               |

| ID <sup>a</sup> | Fold Change <sup>b</sup> | Adjusted <i>P</i><br>value | Rank <sup>c</sup> |
|-----------------|--------------------------|----------------------------|-------------------|
| EcE22_5126      | -1.590                   | 1.99E-06                   | 175               |
| EcE22_5189      | -1.529                   | 2.10E-05                   | 318               |
| EcE22_5189      | -1.513                   | 8.27E-05                   | 414               |
| EcE22_5189      | -1.487                   | 2.71E-04                   | 512               |
| EcE22_5190      | -1.595                   | 1.14E-05                   | 266               |
| EcE22_5190      | -1.561                   | 5.43E-05                   | 384               |
| EcE22_5190      | -1.511                   | 6.43E-05                   | 402               |
| EcE22_5191      | -1.664                   | 3.32E-05                   | 342               |
| EcE22_5191      | -1.503                   | 6.25E-05                   | 397               |
| EcE22_5191      | -1.447                   | 1.70E-04                   | 472               |
| EcE22_5235      | -1.420                   | 4.77E-04                   | 555               |
| EcE22_5240      | -1.466                   | 9.98E-07                   | 136               |
| EcE22_5240      | -1.416                   | 1.40E-06                   | 160               |
| EcE22_5321      | 17.448                   | 1.05E-10                   | 12                |
| EcE22_5321      | 19.423                   | 1.11E-10                   | 14                |
| EcE22_5321      | 31.014                   | 1.61E-09                   | 34                |
| EcE22_5323      | 37.180                   | 4.32E-11                   | 5                 |
| EcE22_5323      | 45.422                   | 8.69E-10                   | 29                |
| EcE22_5323      | 129.561                  | 3.68E-09                   | 39                |
| EcE22_5324      | 1.721                    | 1.64E-06                   | 169               |
| EcE22_5324      | 2.832                    | 4.96E-06                   | 220               |
| EcE22_5324      | 3.132                    | 1.30E-05                   | 276               |
| EcE22_5333      | 246.081                  | 1.74E-07                   | 82                |
| EcE22_5333      | 411.652                  | 2.75E-06                   | 193               |
| EcE22_5333      | 513.228                  | 9.70E-06                   | 260               |
| EcE22_5334      | 32.614                   | 1.53E-11                   | 1                 |
| EcE22_5334      | 42.286                   | 2.57E-10                   | 21                |
| EcE22_5334      | 43.221                   | 8.27E-10                   | 26                |
| EcE22_5335      | 29.217                   | 2.90E-11                   | 2                 |
| EcE22_5335      | 32.117                   | 8.69E-10                   | 30                |
| EcE22_5335      | 44.564                   | 1.97E-09                   | 35                |
| EcE22_5336      | 49.303                   | 4.23E-10                   | 22                |
| EcE22_5339      | -1.516                   | 6.88E-03                   | 653               |
| EcE22_5339      | -1.511                   | 9.07E-03                   | 655               |
| EcE22_5339      | -1.443                   | 1.61E-02                   | 658               |
| EcE22_5340      | 7.518                    | 5.76E-11                   | 6                 |
| EcE22_5340      | 19.473                   | 1.11E-10                   | 15                |
| EcE22_5340      | 24.848                   | 2.09E-06                   | 177               |
| EcE22_5367      | -3.605                   | 3.82E-09                   | 41                |
| EcE22_5367      | -3.454                   | 5.09E-09                   | 46                |
| EcE22_5367      | -3.309                   | 1.10E-08                   | 50                |
| EcE22_5368      | -1.543                   | 1.13E-06                   | 151               |
| EcE22_5407      | -1.469                   | 4.83E-06                   | 217               |
| EcE22_5407      | -1.455                   | 6.49E-06                   | 235               |
| EcE22_5407      | -1.416                   | 3.62E-05                   | 344               |
| EcE22_5425      | -1.606                   | 9.95E-05                   | 426               |
| EcE22_5425      | -1.569                   | 1.84E-04                   | 477               |
| EcE22_5425      | -1.539                   | 2.28E-04                   | 497               |

| ID <sup>a</sup> | Fold Change <sup>b</sup> | Adjusted <i>P</i> value | Rank <sup>c</sup> |
|-----------------|--------------------------|-------------------------|-------------------|
| EcE22_5427      | -1.429                   | 1.59E-03                | 621               |
| EcE22_5428      | -1.565                   | 7.86E-04                | 591               |
| EcE22_5428      | -1.479                   | 1.14E-03                | 610               |
| EcE22_5428      | -1.467                   | 7.27E-03                | 654               |
| EcE22_5572      | 2.052                    | 2.64E-06                | 190               |
| EcE22_5572      | 2.067                    | 5.34E-06                | 223               |
| EcE22_5572      | 2.113                    | 6.64E-06                | 237               |
| EcE22_5585      | 1.509                    | 6.15E-05                | 395               |
| EcE22_5621      | 1.506                    | 3.01E-05                | 335               |
| EcE22_5716      | 1.563                    | 6.52E-07                | 116               |
| EcE22_5716      | 1.595                    | 3.19E-06                | 200               |
| EcE22_5716      | 1.730                    | 4.83E-06                | 218               |
| EcE22_5813      | -1.461                   | 3.60E-04                | 528               |
| EcE22_5813      | -1.419                   | 5.88E-04                | 569               |

<sup>a</sup> Only those probes (representing 270 ORFs) with an adjusted *P* value < 0.05 are shown.

<sup>b</sup> The negative and positive values represent the degree of down- and up-regulation, respectively.

<sup>c</sup> The ranking is based on the adjusted *P* value.
